# La importancia de la temperatura del agua en las redes de abastecimiento

## *The importance of water temperature in water supply systems*

Sarai Díaz \*a1 y Javier González a2

<sup>a</sup>Universidad de Castilla-La Mancha, Escuela Técnica Superior de Ingeniería de Caminos, Canales y Puertos, Departamento de Ingeniería Civil y de la Edificación. Edificio Politécnico Av. Camilo José Cela s/n, 13071, Ciudad Real (España).

E-mail: <sup>a1</sup>Sarai.Diaz@uclm.es, <sup>a2</sup>Javier.Gonzalez@uclm.es

\*Autor para correspondencia

Recibido: 17/03/2022

Aceptado: 29/03/2022

Publicado: 30/04/2022

**Citar como:** Díaz, S., González, J. 2022. The importance of water temperature in water supply systems. *Ingeniería del agua*, 26(2), 107-123. <https://doi.org/10.4995/ia.2022.17366>

---

## RESUMEN

La temperatura afecta a los procesos físicos, químicos y biológicos involucrados en el transporte del agua potable, por lo que condiciona la calidad del agua suministrada. Diferentes trabajos han puesto de manifiesto el papel de esta variable de modo específico en cada proceso o fenómeno. A su vez, se han desarrollado investigaciones sobre el comportamiento de la temperatura en las redes de agua y las posibilidades para su modelización. Todas ellas son contribuciones independientes, pero no se cuenta con una visión global y conjunta del papel de la temperatura en el comportamiento de una red de distribución, aun cuando esta variable es una de las que más se verá afectada por el cambio climático. El objetivo de este artículo es revisar la importancia de la temperatura en los diferentes procesos a los que se ve sometida el agua a lo largo de la red de distribución y recopilar lo que se conoce hasta el momento sobre modelización de temperatura en redes de abastecimiento. Esta revisión de la literatura resalta la importancia de las condiciones térmicas en las diferentes dinámicas dentro de una red de distribución, detectando la necesidad de mejorar el conocimiento sobre su comportamiento, no solo para caracterizar la calidad del agua suministrada en la actualidad, sino también para evaluar las posibles complicaciones que pueden surgir en futuros escenarios de cambio climático.

**Palabras clave** | redes de abastecimiento, agua potable, temperatura, calidad del agua, cambio climático.

---

## ABSTRACT

*Temperature affects the physical, chemical and biological processes involved in the transport of drinking water, conditioning its water quality. Different works have revealed the role of this variable in specific phenomena. At the same time, research has been carried out to characterize temperature behaviour in water supply systems and assess its modelling possibilities. All of them are independent contributions, but there is not a global and joint vision about the role of temperature in the behaviour of a water network, even though this variable is one of those that will be most affected by climate change. The aim of this work is to revise the importance of water temperature in the different processes that occur during water distribution and to compile what is known so far about temperature modelling in water supply systems. This literature review highlights the importance of thermal conditions in the different dynamics within a distribution network, detecting a need to improve knowledge about its behaviour. This is important not only to better understand water quality at present, but also to evaluate the potential complications that may arise in future climate change scenarios.*

**Key words** | water supply, drinking water, temperature, water quality, climate change.

## INTRODUCCIÓN

Las redes de abastecimiento permiten la distribución de agua potable hasta los puntos de consumo y son infraestructuras críticas para garantizar un suministro en cantidad y con calidad suficiente. La “calidad del agua” describe la condición del agua (incluidas sus características físicas, químicas y biológicas) con respecto a su idoneidad para el consumo por parte de la población. Para asegurar que el agua suministrada es apta para el consumo humano, es habitual controlar múltiples parámetros físicos, químicos y biológicos, no solamente a la salida de la Estación de Tratamiento de Agua Potable (ETAP) o los depósitos, sino también a lo largo de la red de distribución. Las reacciones que determinan la evolución de estos parámetros en el espacio y en el tiempo son complejas debido a la interacción entre los microorganismos, los compuestos inorgánicos y los nutrientes presentes en el agua tratada a lo largo de la red de distribución. Estas reacciones se ven condicionadas por las características del agua a la salida del tratamiento, las propias particularidades del sistema de distribución, las condiciones hidráulicas en la red y la temperatura (Douterelo et al., 2018). Es habitual contar con información sobre las propiedades del agua tratada y las características del sistema de distribución (e.g. material y diámetro de las tuberías), por lo que la variabilidad de las condiciones hidráulicas y la evolución de las temperaturas en el sistema son clave para comprender los procesos que rigen la evolución de la calidad del agua. En las últimas décadas, son varios los autores que vienen estudiando la variabilidad espacio-temporal de los consumos (e.g. Buchberger y Wu, 1995; Magini et al., 2008; Díaz y González, 2021; Díaz et al., 2021) y su posible repercusión en la calidad del agua (e.g. Blokker et al., 2008), pero hay pocos trabajos en los que se caracterice la temperatura y sus potenciales impactos sobre la calidad del agua (Agudelo-Vera et al., 2020; Lai y Dzombak, 2021).

Hoy en día se sabe que la temperatura afecta a los procesos físicos, químicos y biológicos asociados al transporte de agua potable (Blokker y Pieterse-Quirijns, 2013). La Organización Mundial de la Salud (WHO, 2011; 2017) recomienda mantener el agua fría suministrada por debajo de 25 °C para evitar posibles problemas vinculados a la proliferación de *Legionella*, pero pocos países incorporan en su legislación regulaciones específicas para hacer un seguimiento de la temperatura del agua (Agudelo-Vera et al., 2020). Esta situación se explica en parte porque, desde un punto de vista práctico, hay poco que los explotadores puedan hacer para modificar o controlar la temperatura del agua (LeChevallier et al., 1996). En España, el Real Decreto 140/2003 (y sus posteriores modificaciones) regulan los parámetros químicos y microbiológicos a comprobar y la frecuencia y el procedimiento de muestreo, pero no hacen referencia explícita a la necesidad de monitorizar la temperatura. Esto hace que, aunque a veces la temperatura del agua se mida como parte del proceso de caracterización de otros parámetros (por ejemplo, la concentración de cloro), no sea habitual registrar las mediciones de temperatura ni analizar posibles correlaciones con otros parámetros indicadores de la calidad del agua. Los pocos casos en los que se registra sistemáticamente la temperatura suelen concentrarse en la entrada a la red (salida del tratamiento) o el grifo del consumidor, por lo que apenas existen datos que permitan comprender el fenómeno de transferencia de calor que se produce a lo largo del sistema y sus implicaciones en la calidad del agua. Este desconocimiento podría suponer un problema en el actual contexto de cambio climático. De acuerdo con la primera entrega del Sexto Informe de Evaluación del Panel Intergubernamental sobre Cambio Climático (IPCC, 2021), las emisiones de gases de efecto invernadero derivadas de la actividad humana son responsables de un aumento aproximado de 1.1 °C desde 1850-1900, y se prevé que la temperatura media mundial promediada durante los próximos 20 años alcance o supere un calentamiento de 1.5 °C. Este calentamiento está asociado con un aumento de la temperatura del agua suministrada (e.g. Delpla et al., 2009), y conlleva un aumento del riesgo para la salud pública (e.g. Bondank et al., 2018), que podría ser especialmente preocupante en países cálidos, como es el caso de España.

El objetivo de este artículo es (1) poner de manifiesto la variabilidad de la temperatura del agua en las redes de distribución, (2) exponer el efecto de la temperatura en diferentes parámetros o procesos determinantes para la calidad del agua suministrada a través de una red de abastecimiento, y (3) recopilar las iniciativas de modelización de temperatura que se han llevado a cabo hasta ahora para caracterizar la dinámica térmica en estos sistemas. Por tanto, este trabajo pretende resaltar la naturaleza cambiante de la temperatura, que puede explicar en parte las diferencias frecuentemente detectadas en los parámetros físicos, químicos y biológicos que gobiernan la calidad del agua, y presenta la modelización de la temperatura como una herramienta para comprender su evolución, cuantificar sus potenciales impactos y asegurar el suministro de agua de calidad en estos tiempos de cambio.

## VARIABILIDAD TÉRMICA EN REDES DE ABASTECIMIENTO

Tal y como se ha explicado en la Introducción, es poco frecuente registrar la temperatura del agua en las redes de abastecimiento. Agudelo-Vera et al. (2020) han realizado recientemente una revisión de la literatura en la que recogen temperaturas habituales en las plantas de tratamiento y el grifo del consumidor en diferentes países. La Tabla 1 resume estos rangos de temperatura, que en general se corresponden con diferentes períodos de medida y épocas del año (ver publicación original para consultar los detalles). No obstante, esta tabla muestra que los rangos de temperatura pueden ser diferentes en la entrada a la red y los nodos terminales (variabilidad espacial) y que existe una amplitud térmica no despreciable debido a las variaciones estacionales (variabilidad temporal). Estas variaciones dependen de múltiples factores, como el origen del agua (captación subterránea vs. captación superficial) o el período analizado (invierno vs. verano), pero evidencian que la temperatura del agua no se puede asumir constante a lo largo del año, con diferencias que pueden superar los 10 °C para una misma red.

**Tabla 1** | Rangos de temperaturas registrados en redes de abastecimiento en diferentes países. Adaptado de Agudelo-Vera et al. (2020).

| País            | Temperatura en planta de tratamiento (°C) | Temperatura en el grifo del consumidor (°C) |
|-----------------|-------------------------------------------|---------------------------------------------|
| Colombia        | 16 a 26                                   | 25 a 28                                     |
| España          | 10 a 29                                   | 10 a 29                                     |
| Francia         | 12 a >25                                  | 10 a >25                                    |
| Italia          | 6 a 15                                    | -                                           |
| Países Bajos    | 2 a 23                                    | 4 a 25                                      |
| Reino Unido     | 2 a 26                                    | 3 a 26                                      |
| República Checa | 24 a 11                                   | 2 a 24                                      |
| Serbia          | 6 a 27                                    | 5 a 18                                      |
| Sudáfrica       | 10 a 28                                   | 20.5 a 24.5                                 |

## EFFECTOS TÉRMICOS EN LA CALIDAD DEL AGUA

En este apartado se revisará la importancia de la temperatura en algunos procesos físicos, químicos y biológicos determinantes para la calidad del agua suministrada a través de las redes de abastecimiento.

### Procesos físicos

La temperatura condiciona las propiedades físicas del agua. Su densidad suele aproximarse como 1000 kg/m<sup>3</sup> a temperatura ambiente, si bien es cierto que disminuye a medida que aumenta la temperatura (aproximadamente 958 kg/m<sup>3</sup> a 100 °C) y por debajo de los 4 °C (densidad hielo 917 kg/m<sup>3</sup>). Debido a que las redes de distribución de agua potable suelen distribuir el agua a temperaturas próximas a la temperatura ambiente, los cambios a nivel de densidad se pueden considerar despreciables. De igual forma, la viscosidad dinámica (viscosidad absoluta) del agua líquida varía a diferentes temperaturas. A temperatura ambiente suele aproximarse como 0.001 kg/m/s, pero este valor puede alcanzar los 0.0003 kg/m/s a 100 °C. Estos cambios son poco importantes en términos absolutos, pero lo cierto es que un aumento de temperatura de 10 a 20 °C supone una reducción en la viscosidad del 30%. Estas variaciones pueden afectar en última instancia a los fenómenos de transporte (Blokker y Pieterse-Quirijns, 2013), determinando la absorción de productos químicos, contaminantes y patógenos (Uber y Boxall, 2010).

### Procesos químicos

Dentro de este apartado se aborda la relación de la temperatura con dos procesos importantes para la operación de las redes de abastecimiento: el decaimiento de cloro (i.e. presencia de desinfectante residual) y la corrosión.

## Decaimiento de cloro

La desinfección es un proceso químico esencial para mantener la seguridad microbiológica y proteger la salud pública asociada al suministro de agua potable. Tiene como objetivo destruir o inactivar microorganismos perjudiciales o patógenos que no han sido eliminados durante las etapas previas del proceso de tratamiento de aguas, y constituye una etapa fundamental de la potabilización. Para garantizar que se cumplen los estándares de calidad de agua no solamente a la salida del tratamiento sino también a lo largo de toda la red de distribución, muchos países exigen mantener un nivel de desinfectante residual (típicamente cloro residual) en todos los puntos del sistema. De acuerdo con la Organización Mundial de la Salud, es deseable mantener el nivel de cloro residual por encima de 0.2 mg/L (WHO, 2017). Algunos estándares nacionales establecen que el nivel mínimo de cloro en el grifo del consumidor es de 0.1-0.2 mg/L a cualquier hora del día (Ozdemir y Buyruk, 2018). Al mismo tiempo, altas concentraciones de cloro se relacionan con problemas de sabor/olor y/o la formación de subproductos de desinfección (como los trihalometanos y los ácidos haloacéticos), que pueden ser perjudiciales para la salud humana. Esto hace que la concentración de cloro a la salida de las plantas de tratamiento (i.e. entrada a la red) se encuentre habitualmente entre 1.0 y 1.5 mg/L (Blokker et al., 2014). La dosificación suele ajustarse para minimizar la cantidad de cloro suministrada a la vez que se garantizan los niveles mínimos de desinfectante residual en las zonas terminales. Habitualmente, la concentración de cloro a la entrada se mide/controla mediante monitorización en continuo, mientras que la comprobación del nivel de cloro en distintos puntos de la red se suele llevar a cabo mediante muestreos puntuales. Algunos autores han puesto de manifiesto la necesidad de sistematizar los procedimientos de muestreo para mejorar el entendimiento de la distribución espacio-temporal de la calidad del agua en la red (e.g. Speight et al., 2004, Da Luz y Kumpel, 2020), pero en la mayoría de los casos este entendimiento se consigue por medio de la modelización matemática.

La calidad del agua se viene modelizando desde los años 1980s. De acuerdo con la revisión de la literatura presentada por Grayman (2018), el primer lanzamiento de EPANET (Rossman, 1993) y otros softwares comerciales en los años 1990s supuso el impulso definitivo para sistematizar la modelización de la calidad del agua. En lo que respecta al cloro, Rossman et al. (1994) presentaron un modelo que permitía simular la evolución del nivel de cloro considerando su decaimiento en el seno del agua y la reacción con la pared. Vasconcelos et al. (1997) estudiaron la cinética del cloro en varias redes de distribución, mostrando los modelos de diferente orden que se pueden adoptar para simular el decaimiento del cloro y la alta variabilidad de sus parámetros en diferentes sistemas. Estas investigaciones fueron clave para la implementación del modelo de calidad del agua en las sucesivas versiones de EPANET y otros softwares de modelización hidráulica 1-D equivalentes. En la actualidad, los softwares disponibles para modelizar la calidad del agua (por ejemplo, EPANET 2.2; Rossman et al., 2020) permiten modelizar el decaimiento del cloro en el seno del agua para un determinado orden de reacción  $n$  y el decaimiento de cloro resultante de las reacciones con la pared atendiendo a un modelo de orden cero o de primer orden. Ya que el objetivo de este artículo es poner de manifiesto la importancia de la temperatura, la formulación del decaimiento del cloro se presenta asumiendo primer orden tanto para el decaimiento en el seno del agua como para la reacción con la pared. Esta combinación será suficiente para explicar la complejidad del proceso de decaimiento y los potenciales efectos de la temperatura, y es una asunción habitual en la literatura (e.g. Vasconcelos et al., 1997; Monteiro et al., 2014, Vrachimis et al., 2021).

El decaimiento del cloro en el seno del fluido (*bulk*, por su nombre en inglés) asumiendo una reacción de primer orden se puede expresar como:

$$\left. \frac{\partial C}{\partial t} \right|_{\text{bulk}} = -k_b \cdot C \quad (1)$$

donde  $C$  (mg/L) es la concentración de cloro,  $t$  (días) es el tiempo de residencia del agua en la red y  $k_b$  (1/días) es el coeficiente de decaimiento de cloro en el seno del fluido. Integrando la Ecuación (1) se obtiene:

$$C(t) = C_0 \cdot e^{-k_b \cdot t} \quad (2)$$

siendo  $C(t)$  (mg/L) la concentración de cloro para un tiempo de residencia  $t$  (días) y  $C_0$  (mg/L) la concentración inicial de cloro. Esta ecuación muestra que el decaimiento de cloro en el seno del fluido es exponencial y depende de  $k_b$ . Este coeficiente de decaimiento no se debe medir directamente en la red de abastecimiento, ya que inmediatamente después de la adición de cloro el desinfectante

reacciona no solo con las sustancias presentes en el seno del fluido sino también con las presentes en la pared de la tubería, que a su vez dependen de la ubicación de la muestra y el régimen de flujo (Fisher et al., 2017). Por este motivo, el coeficiente de decaimiento en el seno del fluido se suele caracterizar mediante ensayos de botella con muestras a la salida de la planta de tratamiento (e.g. Powell et al., 2000). El coeficiente depende de las características del agua tratada y de la temperatura, y puede ser muy variable: entre 0.024 y 17.7 1/día para temperaturas entre 14 y 28 °C (Speight y Boxall, 2015).

La ecuación de Arrhenius permite corregir el coeficiente de decaimiento en función de la temperatura. Fisher et al. (2012) presentan esta ecuación como:

$$k_b(T) = k_b(T_0) \cdot e^{\frac{-E/R \cdot (T_0 - T)}{(273 + T_0) \cdot (273 + T)}} \quad (3)$$

donde  $k_b(T)$  (1/días) es el coeficiente de decaimiento de cloro en el seno del fluido para una temperatura  $T$  (°C),  $k_b(T_0)$  (1/días) es el coeficiente de decaimiento de cloro en el seno del fluido a una temperatura de referencia  $T_0$  (por ejemplo,  $T_0=20$  °C) y  $E/R$  es el coeficiente de activación. El coeficiente de activación también puede variar ampliamente. Fisher et al. (2012) analizan las variaciones en el coeficiente de decaimiento para valores de  $E/R$  entre 5000 y 20000. La Figura 1 muestra la evolución de la concentración de cloro para diferentes valores de  $k_b(T_0)$  y coeficientes de activación. Cada línea muestra que, para un  $k_b(T_0)$  dado, la concentración de cloro disminuye a lo largo del tiempo. Este decaimiento se hace más acusado a medida que aumenta la temperatura, y su evolución a lo largo del tiempo también varía notablemente en función del coeficiente de activación. Las diferentes líneas ilustran cómo varía el decaimiento en función del coeficiente de referencia  $k_b(T_0)$ . Para ello, se han utilizado los valores mínimo (0.024 1/día a 14 °C) y máximo (17.7 1/día a 21.9 °C) recopilados en Speight y Boxall (2015) y el valor mediano (0.87 1/día a 20 °C) según Blokker et al. (2014). La figura muestra que es esencial conocer el orden de magnitud del coeficiente de decaimiento en el seno del fluido y el coeficiente de activación, así como la temperatura del agua, para poder estimar la concentración de cloro. Es importante resaltar que la Figura 1 estima la concentración de cloro en base a un modelo de primer orden para el decaimiento de cloro en el seno del fluido (Ecuaciones 1-3). Varios autores han demostrado que un modelo de segundo orden proporciona una predicción más precisa de las concentraciones de cloro (e.g. Boccelli et al. 2003; Speight et al., 2009), pero incluso en modelos más complejos (i.e. con más parámetros) es importante tener en cuenta el efecto de la temperatura (e.g. Fisher et al., 2012; Monteiro et al., 2017). El modelo de primer orden se considera suficiente en este trabajo para mostrar el comportamiento exponencial del decaimiento con el tiempo de acuerdo con un coeficiente que, a su vez, varía de forma exponencial con la temperatura. Esta aproximación muestra que las variaciones térmicas habituales en redes de abastecimiento (del orden de 10 °C), pueden suponer la diferencia entre cumplir o no cumplir con el valor recomendado. Una de las dificultades tradicionalmente asociadas al ajuste de los modelos de cloro a partir de medidas reales es la falta de medidas simultáneas de temperatura. Speight y Boxall (2015) resaltan que no considerar la temperatura para modelizar el decaimiento de cloro puede ser una omisión crítica y Monteiro et al. (2017) recomiendan caracterizar el decaimiento de cloro al menos en diferentes estaciones.

Tal y como se ha mencionado, los modelos de decaimiento en el seno del fluido se suelen complementar con modelos que tienen en cuenta las reacciones en la proximidad de la pared. Este decaimiento adicional depende de la reacción del cloro con la pared, la biopelícula que crece en ella y los productos de corrosión u otras partículas adheridas a la pared (Fisher et al., 2011a). Este segundo término es variable en la red y más difícil de caracterizar, ya que involucra procesos químicos y biológicos por ahora difíciles de reproducir. Se suele estimar como la diferencia entre el nivel de cloro en una posición concreta y los valores calculados conforme al modelo de decaimiento de cloro en el seno del fluido, que solamente depende de las características del agua y el tiempo de residencia (Fisher et al., 2011b). Este decaimiento se puede extrapolar ajustando valores de decaimiento por reacción en la pared en base a esas medidas puntuales. Atendiendo a un modelo de primer orden, el término de decaimiento en la pared (*wall*, por su nombre en inglés) se simula como:

$$\left. \frac{\partial C}{\partial t} \right|_{\text{wall}} = - \frac{4 \cdot k_w \cdot k_f}{d \cdot (k_w + k_f)} \cdot C \quad (4)$$

donde  $d$  (m) es el diámetro de la tubería,  $k_w$  (m/día) es el coeficiente de decaimiento en la pared y  $k_f$  (m/día) es el coeficiente de transferencia de masa. El coeficiente de decaimiento en la pared se puede estimar a nivel global para la red, por zonas (para tuberías de características similares) o de forma inversamente proporcional al coeficiente de rugosidad de la tubería (Vasconcelos et al.,

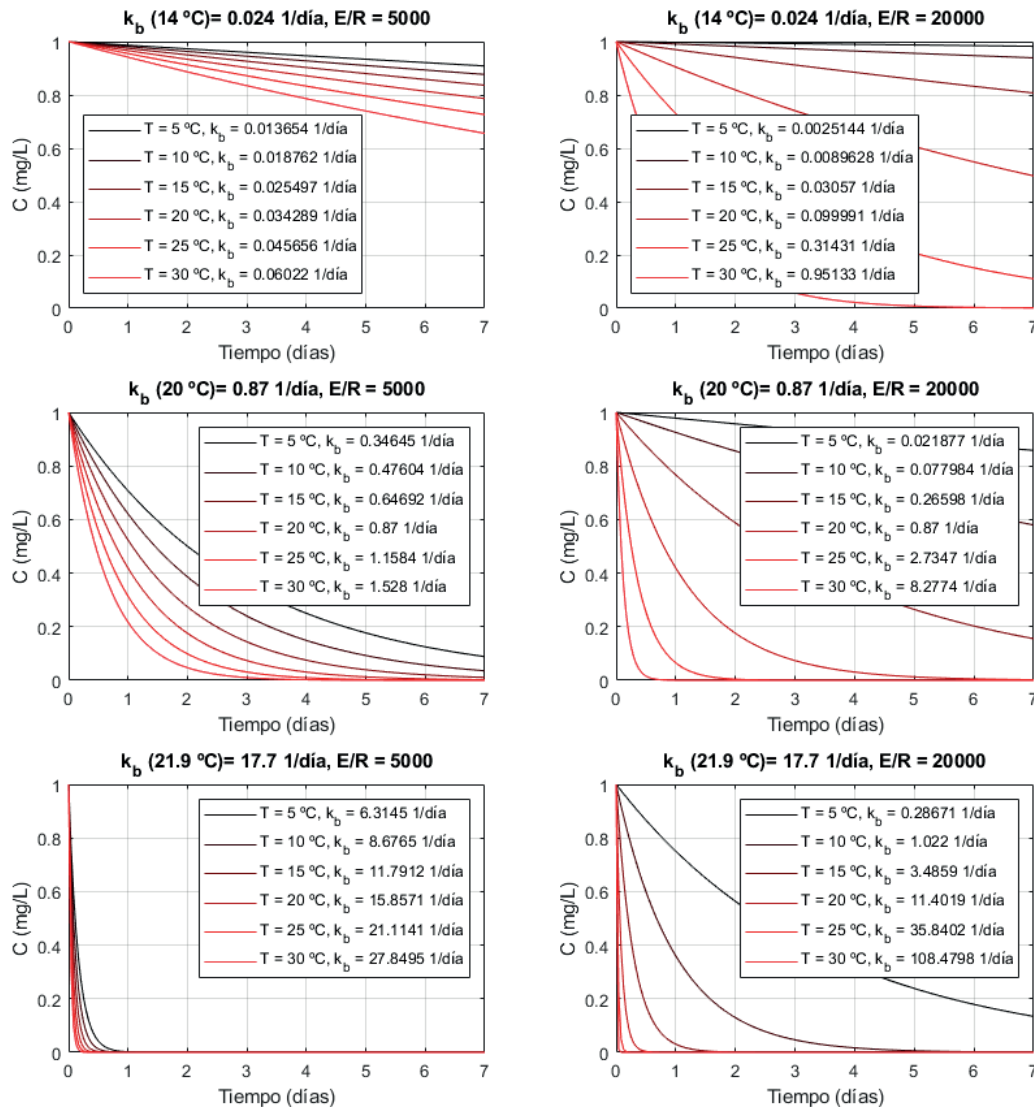

**Figura 1** | Evolución de la concentración de cloro a lo largo del tiempo para diferentes coeficientes de decaimiento, coeficientes de activación y temperaturas: modelo de decaimiento de cloro en el seno del fluido de primer orden.

1997; Minaee et al., 2019), si bien es cierto que está sometido a una incertidumbre alta por los complejos procesos que representa. Por su parte, el coeficiente de transferencia de masa se puede calcular como:

$$k_f = Sh \cdot \frac{D}{d} \quad (5)$$

siendo  $Sh$  (–) el número de Sherwood y  $D$  ( $m^2/día$ ) la difusividad molecular del cloro en el agua. A su vez, el número de Sherwood se puede calcular como:

$$Sh = \begin{cases} 3.65 + \frac{0.0668 \cdot d/L \cdot Re \cdot Sc}{1 + 0.04 \cdot [d/L \cdot Re \cdot Sc]^{2/3}} & \text{si } Re < 2300 \\ 0.0149 \cdot Re^{0.88} \cdot Sc^{1/3} & \text{si } Re > 2300 \end{cases} \quad (6)$$

donde  $L$  (m) es la longitud de la tubería,  $Re$  (–) es el número de Reynolds y  $Sc$  (–) es el número de Schmidt.

Las Ecuaciones (4)-(6) reflejan que el decaimiento de cloro asociado a la reacción con la pared también depende de la temperatura en esta versión de primer orden, ya que involucra variables como la viscosidad cinemática (a través del número de Reynolds) y la difusividad molecular. Es importante no perder de vista que estas expresiones son una forma de modelizar los complejos procesos químicos y biológicos que tienen lugar en la pared de la tubería, que a su vez condicionan la concentración de cloro. Varios autores han llevado a cabo estudios específicos para mejorar la caracterización del decaimiento en la pared (e.g. Hallam et al., 2002; Clark et al., 2012). Fisher et al. (2017) han desarrollado un modelo alternativo (EXPBIO) para tener en cuenta la actividad de la biopelícula. Dada la gran cantidad de trabajos que se siguen realizando a fecha de hoy para caracterizar el comportamiento de la corrosión y las biopelículas (ver apartados siguientes), parece que todavía es necesario avanzar en el conocimiento de la realidad química y microbiológica de las redes de abastecimiento (y su interacción con la temperatura) para plantear un modelo de cloro universal que permita modelizar la concentración de cloro teniendo en cuenta todos los procesos que interactúan.

Por último, es importante resaltar que la modelización presentada en este trabajo (Ecuaciones 1-6) se centra en el decaimiento a lo largo de la red, sin entrar a valorar la adecuación de la modelización del decaimiento en las uniones de varios tubos o los depósitos (Vidal et al., 1994). Además, esta aproximación simplificada considera el cloro como el único compuesto susceptible de modelización. Considerar un único constituyente es la aproximación más sencilla para modelizar la evolución del desinfectante en una red de abastecimiento. El desarrollo de software especialmente preparado para tener en cuenta diferentes compuestos, como por ejemplo EPANET-MSX (Shang et al., 2008), plantea desde hace años la posibilidad de modelizar la interacción de los diferentes subproductos de la desinfección (e.g. Fisher et al., 2011a; Abhijith et al., 2021). Incluso antes de aparecer esta herramienta, ya se había detectado correlación entre la presencia de trihalometanos y la temperatura (e.g. Rodríguez y Sérodes, 2001; Rodríguez et al., 2004; Montoya-Pachongo et al., 2018), lo cual refleja de nuevo la importancia de evaluar correctamente la temperatura para el control de la desinfección. También merece la pena resaltar que en sistemas sometidos a altas temperaturas se pueden utilizar cloraminas como desinfectante residual alternativo al cloro, lo cual permite controlar el crecimiento biológico y limitar la formación de subproductos (LeChevallier et al., 1996). No obstante, la temperatura también afecta al proceso de desinfección y la generación de subproductos cuando se utilizan cloraminas (Yang et al., 2007). Otras alternativas de desinfectante residual se han valorado a lo largo de los años (e.g. Gagnon et al., 2006) e incluso algunos países europeos ya prescinden de desinfectante residual en sus redes (ver Agudelo-Vera et al., 2020 para referencias). En cualquier caso, la temperatura es determinante en el resto de los procesos físicos, químicos y biológicos que se producen en las redes.

## Corrosión

La corrosión consiste en el deterioro de un material como consecuencia de un ataque electroquímico por parte de su entorno. Supone un problema para la gestión de las redes de abastecimiento desde hace siglos, ya que las tuberías de acero, fundición gris y fundición dúctil son susceptibles de sufrir procesos de corrosión. Según AWWA (1996), a finales del siglo XX la mayoría de las tuberías de las redes de distribución estaban constituidas por tubos susceptibles de corrosión (38% fundición gris, 22% fundición dúctil y 5% acero). La corrosión de las tuberías de un sistema de abastecimiento puede causar tres problemas (McNeill y Edwards, 2001): (1) pérdida de masa y consiguiente adelgazamiento de la pared del tubo, debido a la oxidación a especies de hierro soluble o incrustaciones que contienen hierro, (2) acumulación del material liberado en forma de tubérculos o incrustaciones que aumentan la pérdida de energía y reducen la capacidad de la tubería, y (3) liberación de subproductos de la corrosión al agua, que puede llevar asociada la aparición de un color rojizo en el agua, con las consiguientes quejas por parte de los consumidores. Estos procesos son determinantes para cuantificar la vida útil de las tuberías, ya que la corrosión es el mecanismo de fallo predominante en tuberías que transportan agua potable (Li y Mahmoodian, 2013).

McNeill y Edwards (2001) realizan una extensa revisión de la literatura para identificar los factores que influyen en la corrosión en los sistemas de abastecimiento: la calidad y composición del agua, el desinfectante residual utilizado, la edad de la tubería, la formación de incrustaciones, la temperatura, las condiciones del flujo, la actividad biológica y la posible existencia de inhibidores de corrosión. Esta lista evidencia la relación existente entre la corrosión y algunos otros procesos físicos, químicos y biológicos abordados en este trabajo y pone de manifiesto la dificultad de ajustar modelos que permitan predecir la evolución de la corrosión. La temperatura afecta a varios de los parámetros que influyen en la corrosión (actividad biológica, propiedades físicas y termodinámicas de las incrustaciones, velocidades de reacción, etc.), pero son pocos los estudios que analizan su

efecto de forma específica. McNeill y Edwards (2002) resaltaron la importancia de analizar el efecto de considerar diferentes temperaturas constantes (e.g. ciclos temperatura anual) y la ocurrencia de gradientes térmicos (e.g. ciclos temperatura diaria) en el proceso de corrosión, y afirmaron que mientras no se comprenda el papel de la temperatura, el conocimiento de los procesos de corrosión es limitado. Desde entonces, son varios los estudios que han explorado el efecto de la temperatura en la corrosión y/o la liberación de metales en diferentes sistemas relacionadas con el abastecimiento (e.g. Rushing y Edwards, 2004; Masters et al., 2016; Li et al., 2020; Xu et al., 2020). La mayoría de estos estudios analizan casos concretos, por lo que de nuevo resulta difícil cuantificar el efecto de la variabilidad térmica en la corrosión que se produce en las redes de abastecimiento. Un mayor control de la temperatura en las campañas experimentales contribuiría a mejorar el entendimiento del efecto de la corrosión en la vida útil, la aparición de fugas y la rotura de las tuberías. Estos problemas y su relación con la corrosión han sido objeto de estudio desde hace años (Sadiq et al., 2004; Netto et al., 2005; Teixeira et al., 2008), pero su relación con la temperatura no se explora con frecuencia de forma conjunta (Jun et al., 2020).

Por último, merece la pena resaltar que el agua puede adquirir color como resultado de otros procesos más allá de la corrosión. El término *discolouration* se utiliza en inglés para referirse al cambio del color del agua e inicialmente se atribuía a incidentes relacionados con la corrosión o la exposición durante largos períodos de tiempo a altas concentraciones (Boxall et al., 2001). No obstante, estos fenómenos también se perciben en redes con un número limitado de elementos propensos a la corrosión, por lo que se puede entender esta “decoloración” como un fenómeno asociado a la movilización de partículas acumuladas en las redes de distribución (Vreeburg y Boxall, 2007), ya sea procedentes de una fuente externa (agua de origen, reactivos durante el tratamiento, etc.) o generadas en el propio sistema (corrosión, erosión de los recubrimientos, crecimiento biológico, reacciones químicas, contaminación externa, etc.). Por tanto, este fenómeno (que se puede cuantificar mediante la medición de la turbidez) es más inclusivo que la corrosión, y puede tener origen físico, químico o biológico. Se ha probado que se registran más quejas relacionadas con el color del agua en verano que en invierno (e.g. van Summeren et al., 2015; Cook et al., 2015), por lo que la acumulación y movilización de material guarda relación con la temperatura. Todavía no se ha cuantificado esta relación de forma sistemática.

## Procesos biológicos

Dentro de este apartado se abordarán específicamente las bacterias coliformes totales y coliformes fecales (concretamente la *Escherichia coli*), habitualmente empleadas como parámetros indicadores de la calidad del agua en el seno del fluido, y las biopelículas, como forma de supervivencia microbiológica en la pared de las tuberías.

### Bacterias coliformes y *Escherichia coli*

Las bacterias coliformes se suelen utilizar como organismos indicadores de la calidad del agua, ya que permiten valorar la potencial presencia de bacterias que pueden causar enfermedades en el agua. La mayoría de estas bacterias no suponen un peligro para la salud humana, pero cuanto mayor sea su número, mayor será la probabilidad de que haya bacterias que causan enfermedades. Es habitual que los estándares de agua potable exijan que no haya bacterias coliformes en el agua potable, ya que su ausencia permite suponer que el suministro es microbiológicamente seguro. Puede ocurrir que esta condición se cumpla a la salida de la planta de tratamiento pero no en algunos puntos de la red, ya que estas bacterias pueden volver a crecer a lo largo del sistema. LeChevallier et al. (1996) identifican un complejo conjunto de factores químicos, físicos, operacionales e ingenieriles que condicionan la posibilidad de recrecimiento, entre ellos la temperatura y el método de desinfección. Su estudio detectó que la ocurrencia de bacterias coliformes es mayor por encima de 15 °C y más frecuente cuando se utiliza cloro residual (en vez de cloraminas) como desinfectante.

La *Escherichia coli* es un tipo de bacteria coliforme fecal que se encuentra en los intestinos de animales y humanos, por lo que su presencia en aguas potables es intolerable y se utiliza frecuentemente como indicador de contaminación fecal. Algunos autores apuntan que el control de la *Escherichia coli* (por sí sola) es un indicador suficiente para garantizar el suministro de agua, ya que puede sobrevivir más que otras bacterias, virus y parásitos, si bien es cierto que su validez como indicador universal depende del origen del agua y otros factores (Edberg et al., 2000). Abberton et al. (2016) estudiaron la posibilidad de que las



bacterias *E. coli* pudieran recrecer en las comunidades que constituyen las biopelículas de las tuberías, pero concluyeron que es poco probable. Aunque no exista una ley cuantitativa universal, son muchas las evidencias que reflejan que la actividad biológica (en general) aumenta en meses cálidos en las instalaciones relacionadas con el abastecimiento de agua potable (e.g. Tokajian y Hashwa, 2003; Zlatanovic et al., 2017; Schleich et al., 2019). La capacidad de crecimiento y la presencia de desinfectante residual condiciona la actividad biológica y depende de la evolución de la temperatura en la red, por lo que conocer la temperatura del agua en los diferentes puntos prueba ser de nuevo trascendental.

Los coliformes totales/fecales se han utilizado tradicionalmente como forma de garantizar la seguridad microbiológica del agua, pero representan menos de un 1% de la diversidad de la comunidad microbiana (Douterelo et al., 2014). Estos mismos autores señalan que existen nuevas técnicas en el ámbito de la microbiología que son más costosas, pero permiten ir un paso más allá en la caracterización de las comunidades existentes no solo en el seno del fluido sino también en las paredes de las tuberías. Fish et al. (2016) han puesto de manifiesto que la investigación tradicional y las regulaciones normativas se han centrado tradicionalmente en caracterizar y controlar las células planctónicas (que flotan en el agua), pero en las redes de abastecimiento es más frecuente encontrar microorganismos adheridos a las tuberías.

### Biopelículas

Los microorganismos tienden a adherirse a las paredes de las tuberías de las redes de abastecimiento para resistir las condiciones que se producen en estos sistemas, desarrollando biopelículas (Simoes et al., 2007). Este modo de vida les confiere varias ventajas, ya que mejora su protección frente a los desinfectantes, facilita el intercambio de material genético, mejora sus capacidades metabólicas y favorece la adquisición de nutrientes (Flemming, 2002). La formación de biopelículas trae consigo una reducción de la calidad del agua, un aumento de la corrosión de las tuberías y una reducción de la seguridad microbiológica debido al aumento de la capacidad de supervivencia de patógenos (e.g. Percival y Walker, 1999; Tsai, 2005).

Las biopelículas consisten en una serie de células embebidas en una matriz de sustancias poliméricas extracelulares (EPS, del inglés *Extracellular Polymeric Substances*) producida de forma microbiana (Costerton et al., 1995). Esta matriz condiciona su capacidad resistente, pero las biopelículas son sistemas complejos donde pueden coexistir bacterias, hongos, arqueas, protozoos y virus (Fish et al., 2016). Estudios sobre la ecología microbiana han permitido identificar que las biopelículas se desarrollan de forma continua y ubicua, pero existen muchos aspectos complejos relacionados con la forma, estructura y composición del microbioma, que a su vez se ve condicionado por el agua suministrada, el material de la tubería y los regímenes hidráulicos a los que ésta se ve sometida (e.g. Batté et al., 2003; Mi et al., 2015; Douterelo et al., 2018).

Aunque se conoce que la temperatura es un factor determinante para la calidad del agua, el crecimiento microbiano y los procesos competitivos (Nescerecka et al., 2014), existe conocimiento limitado sobre los efectos de la temperatura en las biopelículas que se desarrollan en las redes de abastecimiento, especialmente en aquellas que utilizan cloro como desinfectante. Zlatanovic et al. (2017) han mostrado recientemente la influencia de la temperatura en las comunidades bacterianas que se desarrollan en instalaciones domésticas no sometidas a cloración en una situación de estancamiento. Ahmad et al. (2020) también ha detectado que se producen cambios en la comunidad bacteriana como resultado de cambios en la temperatura, de nuevo en ausencia de cloro. Calero et al. (2021) han estudiado recientemente el efecto de la temperatura en redes cloradas, detectando que al aumentar la temperatura se produce un incremento en la acumulación de la biopelícula (ensayos en tuberías de polietileno) y se desencadenan varios cambios en el microbioma. Este tipo de estudios son fundamentales para comprender las características de las biopelículas en diferentes situaciones y las consecuencias derivadas del fenómeno de cambio climático en la calidad del agua suministrada. Además de estar asociado a un aumento de las temperaturas medias, el calentamiento global traerá consigo un aumento de la frecuencia y magnitud de los fenómenos extremos, como las olas de calor, que ya empiezan a percibirse en la monitorización del crecimiento microbiano en algunos sistemas (Pick et al., 2021).

## MODELIZACIÓN DE LA TEMPERATURA EN REDES DE ABASTECIMIENTO

Aunque se conoce que la temperatura es cambiante e importante para muchas de las reacciones y procesos que determinan la calidad del agua, es poco habitual registrar medidas de temperatura y más raro aún tener en cuenta el efecto de la temperatura en la modelización. Los modelos hidráulicos y de calidad del agua suelen considerar temperatura constante (Fisher et al., 2012; Monteiro et al., 2017). Según Agudelo-Vera et al. (2020), solamente Blokker y Pieterse-Quirijns (2013) y Piller y Tavard (2014) han presentado modelos validados para calcular la temperatura a lo largo de un sistema de distribución de agua potable. Estas aproximaciones se basan en asumir una temperatura del suelo fija que constituye la condición de contorno para la transferencia de calor a lo largo de la tubería. Plantean por tanto un problema desacoplado que consiste en (1) calcular la temperatura del suelo despreciando la presencia de la tubería, y (2) calcular la temperatura del agua a partir de ese valor de temperatura para el suelo.

Blokker y Pieterse-Quirijns (2013) utilizan un modelo micrometeorológico para estimar la temperatura del suelo. Este tipo de modelos requiere un gran número de parámetros para simular las condiciones atmosféricas y las características del suelo (Chalhoub et al., 2017). Alternativamente, se podría calcular la temperatura del suelo recurriendo a expresiones sinusoidales para la temperatura en superficie que tienen solución analítica a diferentes profundidades (e.g. Kusuda y Achenback, 1965) o modelos basados en la temperatura del aire que deben reproducir los procesos de convección, evaporación y radiación cerca de la superficie (e.g. Badache et al., 2016). Cualquiera de estos modelos permitiría calcular la temperatura del suelo  $T_{\text{soil}}$  a la profundidad requerida, dando respuesta a la primera fase del fenómeno desacoplado. Una vez que se conoce la temperatura del suelo, la transferencia de calor entre el agua y el suelo (segunda etapa del modelo desacoplado) se puede modelizar como (Blokker y Pieterse-Quirijns, 2013):

$$\frac{\partial T_{\text{water}}}{\partial t} = \frac{4 \cdot h}{C_w \cdot \rho_w \cdot d} \left( \overline{T_{\text{soil}}} - T_{\text{water}} \right) \quad (7)$$

donde  $T_{\text{water}}$  (°C) representa la temperatura del agua,  $h$  (W/m<sup>2</sup>/K) es un coeficiente global de transferencia de calor,  $C_w$  (J/kg/K) es el calor específico del agua,  $\rho_w$  (kg/m<sup>3</sup>) es la densidad del agua a temperatura ambiente,  $d$  (m) es el diámetro de la tubería y  $\overline{T_{\text{soil}}}$  (°C) la temperatura media del suelo a la profundidad analizada. Se trabaja con temperaturas medias para el suelo ya que es razonable asumir que apenas se producen variaciones diarias/semanales (Blokker y Pieterse-Quirijns, 2013; Eck et al., 2016) a las profundidades habituales de las tuberías en las redes de abastecimiento, que varían entre 0.6-2.5 m dependiendo del país (Agudelo-Vera et al. 2020). A su vez, el coeficiente global de transferencia de calor se puede simplificar como:

$$h = \frac{1}{\frac{d}{\text{Nu} \cdot \lambda_w} + \frac{t_p}{\lambda_p}} \quad (8)$$

siendo  $\text{Nu}$  (–) el número de Nusselt,  $\lambda_w$  (W/m/K) la conductividad del agua,  $t_p$  (m) el espesor de la tubería y  $\lambda_p$  (W/m/K) la conductividad de la pared de la tubería. A su vez, el número de Nusselt se puede calcular como:

$$\text{Nu} = \begin{cases} 3.66 & \text{si } \text{Re} < 2300 \\ \frac{(f/8) \cdot (\text{Re} - 1000) \cdot \text{Pr}}{1 + 12.7 \cdot (f/8)^{0.5} \cdot (\text{Pr}^{2/3} - 1)} & \text{si } \text{Re} > 2300 \end{cases} \quad (9)$$

donde  $f$  (–) representa el factor de fricción,  $\text{Re}$  (–) el número de Reynolds y  $\text{Pr}$  (–) el número de Prandtl, que se puede calcular como:

$$\text{Pr} = \frac{\mu \cdot C_w}{\lambda_w} \quad (10)$$

siendo  $\mu$  (kg/m/s) la viscosidad dinámica, que se puede obtener a partir de la viscosidad cinemática  $\nu$  (m<sup>2</sup>/s) y la densidad de forma directa como  $\mu = \nu \cdot \rho_w$ .

Las Ecuaciones (7)-(10) se pueden implementar en software para la modelización 1-D de redes de abastecimiento, como es el caso de la extensión EPANET-MSX (Shang et al., 2008). Este tipo de implementaciones ha probado ser útil para detectar tendencias en el comportamiento de la temperatura en las redes de abastecimiento. Blokker y Pieterse-Quirijns (2013) analizan

varios casos en Países Bajos y concluyen que la temperatura del agua se mantiene próxima a la temperatura del agua a la entrada a la red (i.e. salida de la planta de tratamiento) en la red de transporte, mientras que la temperatura del agua se aproxima a la temperatura del suelo a nivel de red de distribución. Estos autores afirman que puede ser suficiente medir la temperatura del suelo para tener una estimación de la temperatura del agua. No obstante, estas conclusiones pueden venir condicionadas por las simplificaciones de este enfoque desacoplado. La interacción entre la temperatura del suelo y la temperatura del agua es en realidad un fenómeno complejo, ya que la temperatura del suelo alrededor de la tubería también se ve afectada por la temperatura del agua (Agudelo-Vera et al., 2020), i.e. en realidad se trata de un problema acoplado. En este sentido, es importante resaltar que la Ecuación (8) representa un sumatorio de las resistencias que intervienen en el proceso de transferencia de calor. El primer término del denominador se refiere a la convección en el agua, y el segundo término se corresponde con la conducción a través de la tubería (Çengel y Ghajar, 2011). En este sumatorio no se tiene en cuenta la conducción de calor a través del suelo. Esta simplificación es equivalente a considerar que el suelo tiene un calor específico infinito, es decir, que su temperatura es constante y no se ve influenciada por la transferencia de calor hacia/desde la tubería.

La interacción térmica entre el fluido transportado por una tubería enterrada y el suelo que la rodea sí que ha sido estudiada en otras infraestructuras. Este es el caso de las redes de saneamiento, donde la modelización de temperatura ha ganado importancia en los últimos años para evaluar el potencial de recuperación del calor que desprenden estos sistemas. En estas redes, es habitual asumir una zona de influencia alrededor de los colectores y medir la temperatura del suelo para ajustar la dimensión de esta zona de influencia, donde se considera la conducción a través del suelo (Durrenmatt y Wanner, 2008; Abdel-Aal et al., 2014). Este enfoque va un paso más allá de la modelización térmica tradicional en las redes de abastecimiento, ya que es equivalente a considerar un calor específico finito para el suelo en esta zona de influencia. Sin embargo, su uso no está demasiado extendido y se aplica fundamentalmente para el análisis de instalaciones experimentales. La interacción suelo-fluido también se ha estudiado en el ámbito geotérmico. Las bombas de calor geotérmicas se pueden utilizar para aprovechar la temperatura menos variable del suelo (en comparación con la temperatura del aire) como forma de calefacción en invierno y refrigeración en verano. Ya que el dimensionamiento de estos sistemas depende de la diferencia de temperatura (y por tanto, de la interacción) entre el fluido y el suelo, a lo largo de los años se han desarrollado diferentes planteamientos experimentales, numéricos y analíticos para estudiar el fenómeno de transferencia de calor en toda su complejidad (Gan, 2019). Concretamente, las propuestas planteadas para bombas de calor geotérmicas horizontales (i.e. paralelas a la superficie) podrían ser en principio aplicables a la modelización de redes de abastecimiento (e.g. Claesson y Dunand, 1983; Fontaine et al., 2011; Lamarche, 2019). El conocimiento adquirido en estas otras infraestructuras supone una oportunidad para impulsar la modelización de la temperatura en las redes de abastecimiento. La Figura 2 es un DAFO (gráfico que representa Debilidades – Amenazas – Fortalezas – Oportunidades) del estado del conocimiento y la forma con la que se trata actualmente la temperatura en el estudio de los fenómenos que tienen lugar en estos sistemas. Esta figura muestra que la modelación, junto con la incorporación de la temperatura como variable de estudio en las campañas experimentales, podría ser una herramienta clave para comprender la evolución de la temperatura y sus potenciales impactos en el contexto de cambio climático actual.

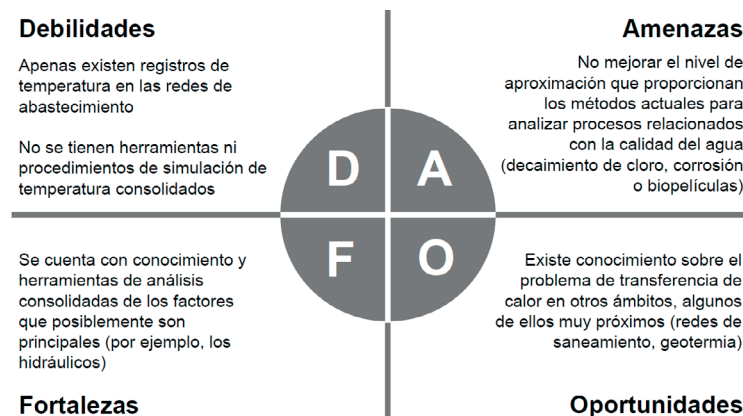

**Figura 2** | Gráfico DAFO sobre el estado del conocimiento y la forma con la que se trata actualmente la temperatura en el estudio de los fenómenos de las redes de abastecimiento: la modelación como herramienta de análisis.

---

## CONCLUSIONES

Este trabajo es una revisión de la literatura concebida para contextualizar el papel de la temperatura en los procesos que tienen lugar en las redes de distribución de agua potable, ya que existe un gran número de trabajos relacionados con esta variable pero no existe una visión global conjunta sobre sus efectos. Esta recopilación ha puesto de manifiesto que la temperatura del agua es cambiante en el tiempo y en el espacio, con diferencias que pueden ser notables en una misma red de distribución. Además, ha mostrado que la variación de la temperatura en estos rangos afecta a los procesos físicos (e.g. capacidad de transporte), químicos (e.g. decaimiento de cloro y corrosión) y biológicos (e.g. crecimiento de bacterias en el seno del agua y biopelículas) que tienen lugar en las redes de abastecimiento de agua potable. Los trabajos existentes muestran que estos procesos (y por tanto, la calidad del suministro) son sensibles a la temperatura, si bien es cierto que no es sencillo cuantificar los efectos de la variabilidad térmica en los parámetros de calidad debido a los múltiples factores que los condicionan. Por tanto, el análisis de la temperatura es una caracterización inicial necesaria para estudiar otros fenómenos en la red que son sensibles a la temperatura.

Este artículo pretende motivar la realización de trabajos experimentales que exploren la relación de estos procesos físicos, químicos y biológicos con la temperatura en condiciones realistas. Estas investigaciones serán además clave para mejorar la comprensión de la dinámica térmica y mejorar la estrategia de modelización de la temperatura que se ha utilizado hasta ahora en redes de abastecimiento, la cual supone una simplificación del complejo proceso de transferencia de calor que tiene lugar en la realidad. Por otro lado, pretende llamar la atención de los operadores, ya que aunque hasta ahora la monitorización de la temperatura no haya sido trascendental, existe incertidumbre sobre los posibles efectos del cambio climático en la gestión de las redes de abastecimiento. Es cierto que desde un punto de vista práctico es difícil controlar la temperatura a la que se suministra el agua, pero sería recomendable realizar el seguimiento de la temperatura del agua servida en algunos casos de estudio para evidenciar y cuantificar los efectos reales en las redes, evaluar sus potenciales consecuencias, adaptar la gestión o valorar la conveniencia de adoptar reglas de buena práctica durante la fase de diseño (elección de materiales, profundidad de las tuberías, etc.).

---

## AGRADECIMIENTOS

Esta publicación es parte del proyecto de I+D+i PID2019-111506RB-00, financiado por MCIN/AEI/10.13039/501100011033. Los autores agradecen también la colaboración de la Junta de Comunidades de Castilla-La Mancha a través del proyecto SBPLY/19/180501/000162, cofinanciado por Fondos FEDER - Una manera de hacer Europa.

---

## REFERENCIAS

- Abberton, C.L., Bereschenko, L., van der Wielen, P.W.J.J., Smith, C.J. 2016. Survival, biofilm formation, and growth potential of environmental and enteric *Escherichia coli* strains in drinking water microcosms. *Applied and Environmental Microbiology*, 82(17), 5320-5331. <https://doi.org/10.1128/AEM.01569-16>
- Abdel-Aal, M., Smits, R., Mohamed, M., de Bussem, K., Schellart, A., Tait, S. 2014. Modelling the viability of heat recovery from combined sewers. *Water Science and Technology*, 70(2), 297-306. <https://doi.org/10.2166/wst.2014.218>
- Abhijith, G.R., Kadinski, L., Ostfeld, A. 2021. Modeling bacterial regrowth and trihalomethane formation in drinking water distribution systems. *Water*, 13, 463. <https://doi.org/10.3390/w13040463>
- Agudelo-Vera, C., Avvedimento, S., Boxall, J., Creaco, E., de Kater, H., Di Nardo, A., Djukic, A., Douterelo, I., Fish, K.E., Iglesias Rey, P.L., Jacimovic, N., Jacobs, H.E., Kapelan, Z., Martínez Solano, J., Montoya Pachongo, C., Piller, O., Quintiliani, C., Rucka, J., Tuhovcak, L., Blokker, M. 2020. Drinking water temperature around the globe: understanding, policies, challenges and opportunities. *Water*, 12(4), 1049. <https://doi.org/10.3390/w12041049>

- Ahmad, J.I., Liu, G., van der Wielen, P.W.J.J., Mederna, G., van der Hoek, J.P. 2020. Effects of cold recovery technology on the microbial drinking water quality in unchlorinated distribution systems. *Environmental Research*, 183, 109175. <https://doi.org/10.1016/j.envres.2020.109175>
- AWWA. 1996. *WATER STATS Survey*. Denver, US.
- Badache, M., Eslami-Nejad, P., Ouzzane, M., Aidoun, Z., Lamarche, L. 2016. A new modeling approach for improved ground temperature profile determination. *Renewable Energy*, 85, 436-444. <https://doi.org/10.1016/j.renene.2015.06.020>
- Batté, M., Appenzeller, B.M.R., Grandjean, D., Fass, S., Gauthier, V., Jorand, F., Mathieu, L., Boualam, M., Saby, S., Block, J.C. 2003. Biofilms in drinking water distribution systems. *Reviews in Environmental Science and Biotechnology*, 2, 147-168. <https://doi.org/10.1023/B:RESB.0000040456.71537.29>
- Blokker, E.J.M., Vreeburg, J.H.G., Buchberger, S.G., van Dijk, J.C. 2008. Importance of demand modelling in network water quality models: a review. *Drinking Water Engineering and Science*, 1, 27-38. <https://doi.org/10.5194/dwes-1-27-2008>
- Blokker, E.J.M., Pieterse-Quirijns, I., 2013. Modeling temperature in the drinking water distribution system. *Journal American Water Works Association*, 105, E19-E28. <https://doi.org/10.5942/jawwa.2013.105.0011>
- Blokker, M., Vreeburg, J., Speight, V. 2014. Residual chlorine in the extremities of the drinking water distribution system: the influence of stochastic water demands. *Procedia Engineering*, 70, 172-180. <https://doi.org/10.1016/j.proeng.2014.02.020>
- Boccelli, D.L., Tryby, M.E., Uber, J.G., Summers, R.S. 2003. A reactive species model for chlorine decay and THM formation under rechlorination conditions. *Water Research*, 37(11), 2654-2666. [https://doi.org/10.1016/S0043-1354\(03\)00067-8](https://doi.org/10.1016/S0043-1354(03)00067-8)
- Bondank, E.M., Chester, M.V., Ruddell, B.L. 2018. Water distribution system failure risks with increasing temperatures. *Environmental Science and Technology*, 52, 9605-9614. <https://doi.org/10.1021/acs.est.7b01591>
- Boxall, J.B., Skipworth, P.J., Saul, A.J. 2001. A novel approach to modelling sediment movement in distribution mains based on particle characteristics. *Proceedings of the Computing and Control in the Water Industry Conference*, De Monfort University, UK.
- Buchberger, S.G., Wu, L. 1995. Model for instantaneous residential water demands. *Journal of Hydraulic Engineering*, 121(3), 232-246. [https://doi.org/10.1061/\(ASCE\)0733-9429\(1995\)121:3\(232\)](https://doi.org/10.1061/(ASCE)0733-9429(1995)121:3(232))
- Calero, C., Boxall, J., Soria-Carrasco, V., Martínez, S., Douterelo, I. 2021. Implications of climate change: How does increased water temperature influence biofilm and water quality of chlorinated drinking water distribution systems? *Frontiers in Microbiology*, 12, 658927. <https://doi.org/10.3389/fmicb.2021.658927>
- Çengel, Y., Ghajar, A. 2011. *Heat and mass transfer: fundamentals and applications*, 4<sup>th</sup> Edition. McGraw-Hill, Portland, USA.
- Chalhoub, M., Bernier, M., Coquet, Y., Philippe, M. 2017. A simple heat and moisture transfer model to predict ground temperature for shallow ground heat exchangers. *Renewable Energy*, 103, 295-307. <https://doi.org/10.1016/j.renene.2016.11.027>
- Claesson, J., Dunand, A. 1983. *Heat extraction from the ground by horizontal pipes: a mathematical analysis*. Report No. D1, Swedish Council for Building Research, Stockholm, Sweden.
- Clark, R.M., Impellitteri, C.A., Schupp, D.A., Panguluri, S. 2012. The effect of velocity on the maintenance of chlorine and chloramine residuals. In: *Proceedings of Water Distribution Systems Analysis Conference*, Adelaide, Australia, 1301-1315.
- Cook, D., Husband, S., Boxall, J. 2015. Operational management of trunk main discolouration risk. *Urban Water Journal*, 13, 382-395. <https://doi.org/10.1080/1573062X.2014.993994>
- Costerton, J.W., Lewandowski, Z., Caldwell, D.E., Korber, D.R., Lappin-Scott, H.M. 1995. Microbial biofilms. *Annual Review of Microbiology*, 49, 711-745. <https://doi.org/10.1146/annurev.mi.49.100195.003431>
- Da Luz, N., Kumpel, E. 2020. Evaluating the impact of sampling design on drinking water quality monitoring program outcomes. *Water Research*, 185, 116217. <https://doi.org/10.1016/j.watres.2020.116217>

- Delpla, I., Jung, A.V., Baures, E., Clement, M., Thomas, O. 2009, Impacts of climate change on surface water quality in relation to drinking water production. *Environmental International*, 35, 1225-1233. <https://doi.org/10.1016/j.envint.2009.07.001>
- Díaz, S., González, J. 2021. Temporal scale effect analysis for water supply systems monitoring based on a microcomponent stochastic demand model. *Journal of Water Resources Planning and Management*, 147(5), 04021023. [https://doi.org/10.1061/\(ASCE\)WR.1943-5452.0001352](https://doi.org/10.1061/(ASCE)WR.1943-5452.0001352)
- Díaz, S., González, J., Galán, A. 2021. Residential micro-consumption characterization based on the user perspective in a citizen science initiative: the #501WaterChallenge experience. *Ingeniería del Agua*, 25(3), 169-185. <https://doi.org/10.4995/Ia.2021.14998>
- Douterelo, I., Sharpe, R.L., Husband, S., Fish, K.E., Boxall, J.B. 2018 Understanding microbial ecology to improve management of drinking water distribution systems. *Wires Water*, 6, e01325. <https://doi.org/10.1002/wat2.1325>
- Douterelo, I., Boxall, J.B., Deines, P., Sekar, R., Fish, K.E., Biggs, C.A. 2014. Methodological approaches for studying the microbial ecology of drinking water distribution systems. *Water Research*, 65, 134-156. <https://doi.org/10.1016/j.watres.2014.07.008>
- Durrenmatt, D., Wanner, O. 2008. Simulation of the wastewater temperature in sewers with TEMPEST. *Water Science and Technology*, 57(11), 1809-1815. <https://doi.org/10.2166/wst.2008.291>
- Eck, B. J., Saito, H., McKenna, S.A. 2016. Temperature dynamics and water quality in distribution systems. *IBM Journal of Research and Development*, 60(5/6), 7:1-7:8. <https://doi.org/10.1147/JRD.2016.2594128>
- Edberg, S.C., Rice, E.W., Karlin, R.J., Allen, M.J. 2000. Escherichia coli: the best biological drinking water indicator for public health protection. *Journal of Applied Microbiology*, 88, 106S-116S. <https://doi.org/10.1111/j.1365-2672.2000.tb05338.x>
- Fish, K.E., Osborn, A.M., Boxall, J. 2016. Characterising and understanding the impact of microbial biofilms and the extracellular polymeric substance (EPS) matrix in drinking water distribution systems. *Environmental Science Water Research and Technology*, 2(4), 614-630. <https://doi.org/10.1039/C6EW00039H>
- Fisher, I., Kastl, G., Sathasivan, A., Jegatheesan, V. 2011a. Suitability of chlorine bulk decay models for planning and management of water distribution systems. *Critical Reviews in Environmental Science and Technology*, 41(20), 1843-1882. <https://doi.org/10.1080/10643389.2010.495639>
- Fisher, I., Kastl, G., Sathasivan, A. 2011b. Evaluation of suitable chlorine bulk-decay models for water distribution systems. *Water Research*, 45, 4896-4908. <https://doi.org/10.1016/j.watres.2011.06.032>
- Fisher, I., Kastl, G., Sathasivan, A. 2012. A suitable model of combined effects of temperature and initial condition on chlorine bulk decay in water distribution systems. *Water Research*, 46, 3293-3303. <https://doi.org/10.1016/j.watres.2012.03.017>
- Fisher, I., Kastl, G., Sathasivan, A. 2017. New model of chlorine wall-reaction for simulating chlorine concentration in drinking water distribution systems. *Water Research*, 125, 427-437. <https://doi.org/10.1016/j.watres.2017.08.066>
- Flemming, H.C. (2002) Biofouling in water systems – cases, causes and countermeasures. *Applied Microbiology and Biotechnology*, 59, 629-640. <https://doi.org/10.1007/s00253-002-1066-9>
- Fontaine, P., Marcotte, D., Pasquier, P., Thibodeau, D. 2011. Modeling of horizontal geotexchange systems for building heating and permafrost stabilization. *Geothermics*, 40, 211-220. <https://doi.org/10.1016/j.geothermics.2011.07.002>
- Gagnon, G., Volk, C.J., Chauret, C., Murphy, H.M., O'Leary, K.C.O., Andrews, R.C. 2006. Changes in microbiological quality in model distribution systems after switching from chlorine or chloramines to chlorine dioxide. *Journal of Water Supply: Research and Technology – AQUA*, 55(5), 301-311. <https://doi.org/10.2166/aqua.2006.011>
- Gan, G. 2019. A numerical methodology for comprehensive assessment of the dynamic thermal performance of horizontal ground heat exchangers. *Thermal Science and Engineering Progress*, 11, 365-379. <https://doi.org/10.1016/j.tsep.2019.04.013>
- Grayman, W. 2018. History of water quality modelling in distribution systems. In: *Proceedings of 1st International WDSA/CCWI Joint Conference*, Kingston, Canada.

- Hallam, N.B., West, J.R., Forster, C.F., Powell, J.C., Spencer, I. 2002. The decay of chlorine associated with the pipe wall in water distribution systems. *Water Research*, 36, 3479-3488. [https://doi.org/10.1016/S0043-1354\(02\)00056-8](https://doi.org/10.1016/S0043-1354(02)00056-8)
- IPCC. 2021. Summary for Policymakers. In: *Climate Change 2021: The Physical Science Basis. Contribution of Working Group I to the Sixth Assessment Report of the Intergovernmental Panel on Climate Change* (Masson-Delmotte, V., P. Zhai, A. Pirani, S. L. Connors, C. Péan, S. Berger, N. Caud, Y. Chen, L. Goldfarb, M. I. Gomis, M. Huang, K. Leitzell, E. Lonnoy, J.B.R. Matthews, T. K. Maycock, T. Waterfield, O. Yelekçi, R. Yu and B. Zhou, eds.). Cambridge University Press. In Press.
- Jun, H.J., Park, J.K., Bae, C.H. 2020 Factors affecting steel water-transmission pipe failure and pipe-failure mechanisms. *Journal of Environmental Engineering*, 146(6), 04020034. [https://doi.org/10.1061/\(ASCE\)EE.1943-7870.0001692](https://doi.org/10.1061/(ASCE)EE.1943-7870.0001692)
- Kusuda, T., Achenbach, P. 1965. *Earth temperature and thermal diffusivity at selected stations in the United States*. National Bureau of Standards, Washington, USA.
- Lai, Y., Dzombak, D.A. 2021. Assessing the effect of changing ambient air temperature on water temperature and quality in drinking water distribution systems. *Water*, 13, 1916. <https://doi.org/10.3390/w13141916>
- Lamarche, L. 2019. Horizontal ground heat exchangers modelling. *Applied Thermal Engineering*, 155, 534-545. <https://doi.org/10.1016/j.applthermaleng.2019.04.006>
- LeChevallier, M.W., Welch, N.J., Smith, D.B. 1996. Full-scale studies of factors related to coliform regrowth in drinking water. *Applied and Environmental Microbiology*, 62(7), 2201-2211. <https://doi.org/10.1128/aem.62.7.2201-2211.1996>
- Li, M., Liu, Z., Chen, Y., Korshin, G.V. 2020. Effects of varying temperatures and alkalinities on the corrosion and heavy metal release from low-lead galvanized steel. *Environmental Science and Pollution Research*, 27, 2412-2422. <https://doi.org/10.1007/s11356-019-06893-2>
- Li, C.Q., Mahmoodia, M. 2013. Risk based service life prediction of underground cast iron pipes subjected to corrosion. *Reliability Engineering and System Safety*, 119, 102-108. <https://doi.org/10.1016/j.res.2013.05.013>
- Magini, R., Pallavicini, I., Guercio, R. 2008. Spatial and temporal scaling properties of water demand. *Journal of Water Resources Planning and Management*, 134(3), 276-284. [https://doi.org/10.1061/\(ASCE\)0733-9496\(2008\)134:3\(276\)](https://doi.org/10.1061/(ASCE)0733-9496(2008)134:3(276))
- Masters, S., Welter, G.J., Edwards, M. 2016 Seasonal variations in lead release to potable water. *Environmental Science and Technology*, 50(10), 5269-5277. <https://doi.org/10.1021/acs.est.5b05060>
- McNeill, L.S., Edwards, M. 2001. Iron pipe corrosion in distribution systems. *Journal American Water Works Association*, 93(7), 88-100. <https://doi.org/10.1002/j.1551-8833.2001.tb09246.x>
- McNeill, L.S., Edwards, M. 2002. The importance of temperature in assessing iron pipe corrosion in water distribution systems. *Environmental Monitoring and Assessment*, 77, 229-242. <https://doi.org/10.1023/A:1016021815596>
- Mi, Z., Dai, Y., Xie, S., Chen, C., Zhang, X. 2015. Impact of disinfection on drinking water biofilm bacterial community. *Journal of Environmental Sciences*, 37(1), 200-205. <https://doi.org/10.1016/j.jes.2015.04.008>
- Minaee, R.P., Mokhtari, M., Moghaddam, A., Ebrahimi, A.A., Askarishashi, M., Afsharnia, M. 2019. Wall decay coefficient estimation in a real-life drinking water distribution network. *Water Resources Management*, 33, 1557-1569. <https://doi.org/10.1007/s11269-019-02206-x>
- Monteiro, L., Figuereido, D., Días, S., Freitas, R., Covas, D., Menaia, J., Coelho, S.T. 2014. Modeling of chlorine decay in drinking water supply systems using EPANET MSX. *Procedia Engineering*, 70, 1192-1200. <https://doi.org/10.1016/j.proeng.2014.02.132>
- Monteiro, L., Figuereido, D., Covas, D., Menaia, J. 2017. Integrating water temperature in chlorine decay modelling: a case study. *Urban Water Journal*, 14(10), 1097-1101. <https://doi.org/10.1080/1573062X.2017.1363249>
- Montoya-Pachongo, C., Douterelo, I., Noakes, C., Camargo-Valero, M.A., Sleight, A., Escobar-Rivera, J.C., Torres-Lozada, P. 2018. Field assessment of bacterial communities and total trihalomethanes: implications for drinking water networks. *Science of the Total Environment*, 616-617, 345-354. <https://doi.org/10.1016/j.scitotenv.2017.10.254>

- Nescerecka, A., Rubulis, J., Vital, M., Juhna, T., Hammes, F. 2014. Biological instability in a chlorinated drinking water distribution network. *PLoS One*, 9, e096354. <https://doi.org/10.1371/journal.pone.0096354>
- Netto, T.A., Ferraz, U.S., Estefen, S.F. 2005. The effect of corrosion defects on the burst pressure of pipelines. *Journal of Constructional Steel Research*, 61, 1185-1204. <https://doi.org/10.1016/j.jcsr.2005.02.010>
- Ozdemir, O.M., Buyruk, T. 2018. Effect of travel time and temperature on chlorine bulk decay in water supply pipes. *Journal of Environmental Engineering*, 144(3), 04018002. [https://doi.org/10.1061/\(ASCE\)EE.1943-7870.0001321](https://doi.org/10.1061/(ASCE)EE.1943-7870.0001321)
- Percival, S.L., Walker, J.T. 1999. Potable water and biofilms: a review of the public health implications. *Biofouling*, 14(2), 99-115. <https://doi.org/10.1080/08927019909378402>
- Pick, F., Fish, K., Husband, S., Boxall, J. 2021. Non-invasive biofouling monitoring to assess drinking water distribution system performance. *Frontiers in Microbiology*, 12, 730344. <https://doi.org/10.3389/fmicb.2021.730344>
- Piller, O., Tavad, L. 2014. Modeling the transport of physicochemical parameters for water network security. *Procedia Engineering*, 70, 1344-1352. <https://doi.org/10.1016/j.proeng.2014.02.148>
- Powell, J.C., Hallam, N.B., West, J.R., Forster, C.F., Simms, J. 2000. Factors which control bulk chlorine decay rates. *Water Research*, 34(1), 117-126. [https://doi.org/10.1016/S0043-1354\(99\)00097-4](https://doi.org/10.1016/S0043-1354(99)00097-4)
- Rodríguez, M.J., Sérodes, J.B. 2001. Spatial and temporal evolution of trihalomethanes in three water distribution systems. *Water Research*, 35(6), 1572-1586. [https://doi.org/10.1016/S0043-1354\(00\)00403-6](https://doi.org/10.1016/S0043-1354(00)00403-6)
- Rodríguez, M.J., Sérodes, J.B., Levallois, P. 2004. Behavior of trihalomethanes and haloacetic acids in a drinking water distribution systems. *Water Research*, 38, 4367-4382. <https://doi.org/10.1016/j.watres.2004.08.018>
- Rossman, L.A. 1993. EPANET – An advanced water quality modelling package for distribution systems. In: *Proceedings of AWWA Annual Conference*, San Antonio, Texas.
- Rossman, L.A., Clark, R.M., Grayman, W.M. 1994. Modeling chlorine residuals in drinking-water distribution systems. *Journal of Environmental Engineering*, 120(4), 803-820. [https://doi.org/10.1061/\(ASCE\)0733-9372\(1994\)120:4\(803\)](https://doi.org/10.1061/(ASCE)0733-9372(1994)120:4(803))
- Rossman, L.A., Woo, H., Tryby, M., Shang, F., Janke, R., Haxton, T. 2020. *EPANET 2.2 User Manual*. US Environmental Protection Agency, Ohio, USA.
- Rushing, J.C., Edwards, M. 2004. The role of temperature gradients in residential copper pipe corrosion. *Corrosion Science*, 46(8), 1883-1894. <https://doi.org/10.1016/j.corsci.2003.11.001>
- Sadiq, R., Rajani, B., Kleiner, Y. 2004. Probabilistic risk analysis of corrosion associated failures in cast iron water mains. *Reliability Engineering and System Safety*, 86, 1-10. <https://doi.org/10.1016/j.ress.2003.12.007>
- Schleich, C., Chan, S., Pullerits, K., Besmer, M.D., Paul, C.J., Radstrom, P., Keuchen, A. 2019. Mapping dynamics of bacterial communities in a full-scale drinking water distribution system using flow cytometry. *Water*, 11(10), 2137. <https://doi.org/10.3390/w11102137>
- Shang, F., Uber, J.G., Rossman, L.A. 2008. Modeling reaction and transport of multiple species in water distribution systems. *Environmental Science and Technology*, 42(3), 808-814. <https://doi.org/10.1021/es072011z>
- Simoes, L.C., Simoes, M., Oliveira, R., Vieira, M.J. 2007. Potential of the adhesion of bacteria isolated from drinking water to materials. *Journal of Basic Microbiology*, 47, 174-183. <https://doi.org/10.1002/jobm.200610224>
- Speight, V., Kaslbeek, W.D., DiGiano, F.A. 2004. Randomized stratified sampling methodology for water quality in distribution systems. *Journal of Water Resources Planning and Management*, 130(4), 330-338. [https://doi.org/10.1061/\(ASCE\)0733-9496\(2004\)130:4\(330\)](https://doi.org/10.1061/(ASCE)0733-9496(2004)130:4(330))
- Speight, V., Uber, J., Grayman, W., Martel, K., Friedman, M., Singer, P., DiGiano, F. 2009. *Probabilistic modelling framework for assessing water quality sampling programs*. Water Research Foundation, Denver, USA.



- Speight, V., Boxall, J. 2015. Current perspectives on disinfectant modelling. *Procedia Engineering*, 119, 434-441. <https://doi.org/10.1016/j.proeng.2015.08.906>
- Teixeira, A.P., Soares, C.G., Netto, A.T., Stefen, S.F. 2008. Reliability of pipelines with corrosion defects. *International Journal of Pressure Vessels and Piping*, 85, 228-237. <https://doi.org/10.1016/j.ijpvp.2007.09.002>
- Tokajian, S., Hashwa, F. 2003. Water quality problems associated with intermittent water supply. *Water Science and Technology*, 47(3), 229-234. <https://doi.org/10.2166/wst.2003.0200>
- Tsai, Y. 2005. Simulation of biofilm formation at different assimilable organic carbon concentrations under lower flow velocity condition. *Journal of Basic Microbiology*, 45(6), 475-485. <https://doi.org/10.1002/jobm.200510583>
- Uber, J., Boxall, J. 2010. Multi-species network water quality modelling: current examples, future potential, and research needs. *Proceedings in Tenth Annual International Conference on Computing and Control for the Water Industry*, Sheffield, UK.
- Van Summeren, J., Raterman, B., Vonk, E., Blokker, M., van Erp, J., Vries, D. 2015. Influence of temperature, network diagnostics and demographic factors in discoloration-related customer reports. *Procedia Engineering*, 119, 416-425. <https://doi.org/10.1016/j.proeng.2015.08.903>
- Vasconcelos, J.J., Rossman, L.A., Grayman, W.M., Boulos, P.F., Clark, R.M. 1997. Kinetics of chlorine decay. *Journal American Water Works Association*, 89(7), 54-65. <https://doi.org/10.1002/j.1551-8833.1997.tb08259.x>
- Vidal, R., Martínez, F., Ayza, M. 1994. Aplicaciones de los modelos de calidad en la simulación de las redes de distribución de agua potable. *Ingeniería del Agua*, 1(3). <https://doi.org/10.4995/ia.1994.2644>
- Vrachimis, S.G., Eliades, D.G., Polycarpou, M.M. 2021. Calculating chlorine concentration bounds in water distribution networks: a backtracking uncertainty bounding approach. *Water Resources Research*, 57(5), e2020WR028684. <https://doi.org/10.1029/2020WR028684>
- Vreeburg, J.H.G., Boxall, J.B. 2007. Discolouration in potable water distribution systems: a review. *Water Research*, 41, 519-529. <https://doi.org/10.1016/j.watres.2006.09.028>
- WHO. 2011. *Guidelines for drinking water quality, 4<sup>th</sup> Edition*. World Health Organization, Geneva, Switzerland.
- WHO. 2017. *Guidelines for drinking water quality, 4<sup>th</sup> Edition – 1<sup>st</sup> Addendum*. World Health Organization, Geneva, Switzerland.
- Xu, X., Liu, S., Smith, K., Cui, Y., Wang, Z. 2020. An overview on corrosion of iron and steel components in reclaimed water supply systems and the mechanisms involved. *Journal of Cleaner Production*, 276, 124079. <https://doi.org/10.1016/j.jclepro.2020.124079>
- Yang, X., Shang, C., Westerhoff, P. 2007. Factors affecting formation of haloacetonitriles, halo ketones, chloropicrin and cyanogen halides during chloramination. *Water Research*, 41, 1193-1200. <https://doi.org/10.1016/j.watres.2006.12.004>
- Zlatanovic, L., van der Hoek, J.P., Vreeburg, J.H.G. 2017. An experimental study on the influence of water stagnation and temperature change on water quality in a full-scale domestic drinking water system. *Water Research*, 123, 761-772, <https://doi.org/10.1016/j.watres.2017.07.019>
